# 1 Genetic assimilation of ancestral plasticity during parallel adaptation

2  
3 Daniel P. Wood<sup>1</sup>

4 Jon A. Holmberg<sup>1</sup>

5 Owen G. Osborne<sup>1</sup>

6 Andrew J. Helmstetter<sup>2</sup>

7 Luke T. Dunning<sup>3</sup>

8 Amy R. Ellison<sup>1</sup>

9 Rhian J. Smith<sup>4</sup>

10 Jackie Lighten<sup>5</sup>

11 Alexander S.T. Papadopoulos<sup>1\*</sup>

12  
13 1. Molecular Ecology and Evolution Bangor, Bangor University, Environment Centre for Wales, Deiniol  
14 Road, Bangor, LL57 2UW, United Kingdom.

15 2.FRB-CESAB, Institut Bouisson Bertrand, Rue de l'École de Médecine, 34000 Montpellier

16 3. Department of Animal and Plant Sciences, University of Sheffield, Alfred Denny Building, Western Bank,  
17 Sheffield, S10 2TN, United Kingdom.

18 4. Royal Botanic Gardens, Kew, Richmond, Surrey, TW9 3AE.

19 5. College of Life and Environmental Sciences, University of Exeter, Prince of Wales Road, Exeter, EX4PS,  
20 United Kingdom.

21  
22 \*Corresponding author Alexander S.T. Papadopoulos

23 Email: [a.papadopoulos@bangor.ac.uk](mailto:a.papadopoulos@bangor.ac.uk)

## 24 25 26 Abstract

27 Phenotypic plasticity in ancestral populations is hypothesised to facilitate adaptation, but  
28 evidence supporting its contribution is piecemeal and often contradictory. Further, whether  
29 ancestral plasticity increases the probability of parallel genetic and phenotypic adaptive  
30 changes has not been explored. The most general finding is that nearly all ancestral gene  
31 expression plasticity is reversed following adaptation, but this is usually examined  
32 transcriptome-wide rather than focused on the genes directly involved in adaptation. We  
33 investigated the contribution of ancestral plasticity to adaptive evolution of gene expression  
34 in two independently evolved lineages of zinc-tolerant *Silene uniflora*. We found that the  
35 general pattern of reversion is driven by the absence of a widespread stress response in  
36 zinc-adapted plants compared to ancestral, zinc-sensitive plants. Our experiments show  
37 that reinforcement of ancestral plasticity plays an influential role in the evolution of  
38 plasticity in derived populations and, surprisingly, one third of constitutive differences  
39 between ecotypes are the result of genetic assimilation of ancestral plasticity. Ancestral  
40 plasticity also increases the chance that genes are recruited repeatedly during adaptation.  
41 However, despite a high degree of convergence in gene expression levels between  
42 independently adapted lineages, genes with ancestral plasticity are as likely to have similar  
43 expression levels in adapted populations as genes without. Overall, these results  
44 demonstrate that ancestral plasticity does play an important role in adaptive parallel  
45 evolution, particularly via genetic assimilation across evolutionary replicates.

46

## 47 **Introduction**

48 The contributions of determinism and contingency in shaping evolution are hotly debated  
49 (Gould, 1989; Conway Morris, 2003; Orgogozo, 2015). Whether repeated adaptation to the  
50 same environment results in similar changes at the molecular level is key to understanding  
51 this balance (Gould, 1989; Christin *et al.*, 2010; Losos, 2011; Bolnick *et al.*, 2018), as well  
52 as the predictability of future responses to environmental change (Waldvogel *et al.*, 2020).  
53 Adaptation to novel environments often involves gene expression changes, but previous  
54 studies have found varying degrees of parallelism during repeated adaptation (Hanson *et al.*,  
55 2017; Stern & Crandall, 2018; Parker *et al.*, 2019; Jacobs *et al.*, 2020). These changes  
56 occur at various levels, including in the overlap of shared differentially expressed genes,  
57 fold-changes of these genes, or final expression levels (Ghalambor *et al.*, 2015; Jacobs *et al.*,  
58 2020). Understanding the mechanisms that influence the extent of parallelism is an  
59 important step in predicting evolutionary responses to new environmental challenges  
60 (Stern, 2013; Bolnick *et al.*, 2018; Waldvogel *et al.*, 2020).

61 Phenotypic plasticity in ancestral populations (i.e., ancestral plasticity) is suspected  
62 to play a role in facilitating adaptation to new environments (Baldwin, 1896; Ghalambor  
63 *et al.*, 2007; Schaum *et al.*, 2013). In addition to generally preserving the genetic variability  
64 of a colonising population (Draghi & Whitlock, 2012), plastic responses to new  
65 environments could provide the basis for adaptation by moving the trait values in some  
66 individuals closer to the new local optimum (Levis *et al.*, 2018). Beneficial plasticity of  
67 this kind could be retained in locally adapted populations or genetically assimilated and  
68 canalised into constitutive expression differences (Heckel *et al.*, 2016). Alternatively,  
69 ancestral plasticity that takes expression levels further away from the new optimum is  
70 potentially maladaptive and could hinder adaptation to the novel environment (Velotta *et al.*,  
71 2018; Josephs *et al.*, 2021).

72 Current evidence suggests a variety of possible impacts of ancestral plasticity on  
73 adaptation (Ghalambor *et al.*, 2015; Kenkel & Matz, 2017; Ho & Zhang, 2018; Velotta *et al.*,  
74 2018; Kelly, 2019), but the relationship between plasticity and evolutionary parallelism  
75 has received limited attention (Oke *et al.*, 2016; Bolnick *et al.*, 2018). Other properties of  
76 gene expression in ancestral populations, such as ancestral expression level or tissue  
77 expression location, are associated with increased co-option and potentially parallelism  
78 (Hargreaves *et al.*, 2014; Moreno-Villena *et al.*, 2018). If phenotypic plasticity significantly  
79 facilitates the repurposing of traits during adaptation (Moczek *et al.*, 2011), then beneficial  
80 plasticity may result in greater parallelism than when plasticity is maladaptive.

81 Previous studies have generally found that most ancestral plasticity across  
82 transcriptomes is reversed in derived populations, taking expression values further from  
83 the new optimum (Ho & Zhang, 2018, 2019; Swaegers *et al.*, 2020; Fischer *et al.*, 2021;  
84 although see Mäkinen *et al.*, 2016; Mallard *et al.*, 2020). However, there are examples of  
85 ancestral plasticity in particular genes or traits facilitating subsequent adaptation (Scoville  
86 & Pfrender, 2010; Levis *et al.*, 2018; Velotta *et al.*, 2018; Wang & Althoff, 2019). Most  
87 expression studies on the topic examine transcriptome-wide patterns in ancestrally plastic  
88 genes, rarely considering whether genes involved in evolutionary adaptation to the new  
89 environment are more likely to have possessed beneficial ancestral plasticity, when  
90 compared to the whole transcriptome (Ho & Zhang, 2018; Koch & Guillaume, 2020;  
91 Swaegers *et al.*, 2020; Josephs *et al.*, 2021; Fischer *et al.*, 2021; Bittner *et al.*, 2021).

92 Transcriptome-wide assessments include changes that may not directly contribute to  
93 adaptation (in the evolutionary sense), such as those stemming from general stress  
94 responses. As a result, estimates of the contribution of ancestral plasticity to adaptation  
95 may be distorted in whole transcriptome analysis.

96 Here, we investigate the relationship between ancestral plasticity, adaptation and  
97 parallelism using independently evolved lineages of zinc-tolerant *Silene uniflora* from  
98 contaminated metal mines and local zinc-sensitive coastal populations (Papadopulos *et al.*,  
99 2021). In this species, ancestral coastal populations have repeatedly colonised  
100 contaminated mine soils throughout Great Britain and Ireland over the past 250 years  
101 (Baker, 1974), producing locally adapted populations that can grow at high concentrations  
102 of zinc (Baker, 1974, 1978; Papadopulos *et al.*, 2021). This provides an ideal opportunity  
103 to investigate the role of ancestral plasticity in adaptation across multiple evolutionary  
104 replicates.

## 106 **Results and Discussion**

107 We quantified gene expression in the roots of two independently derived, zinc-tolerant  
108 populations from geographically distant, derelict mines (T1 - England, T2 - Wales) and  
109 their nearest and most closely related zinc-sensitive coastal populations which represent  
110 the ancestral phenotype (S1 and S2; Fig. S1). Extant zinc-sensitive coastal populations  
111 were used as proxies for ancestral expression, which was compared to responses in recently  
112 adapted zinc-tolerant mine populations. We exposed clones of the same individuals to two  
113 treatment conditions (control or zinc-contaminated) and collected RNA-seq data from the  
114 roots of the experimental plants. Our experimental design allowed us to quantify: (i) the  
115 ancestral plastic response to zinc contamination, ii) the extent of convergent gene  
116 expression changes during rapid parallel adaptation; the evolutionary response to ancestral  
117 plasticity at iii) a transcriptome-wide level and iv) for genes plausibly involved in  
118 adaptation; and v) the relationship between ancestral plasticity and convergent gene  
119 expression changes. In so doing, we establish the extent to which rapid adaptation is shaped  
120 by constraint and plasticity, disentangling the influence of general stress responses versus  
121 adaptive responses on patterns of reversion and reinforcement.

122 Heavy metals are highly phytotoxic and high concentrations of zinc have a  
123 considerable impact on growth and fitness of coastal populations of *S. uniflora* (Baker,  
124 1978; Papadopulos *et al.*, 2021). Transcriptome-wide ancestral plasticity (i.e., the response  
125 to zinc in sensitive populations) was dominated by a general and widespread stress  
126 response. In total, 48.0% of the transcriptome (27,607 genes) was differentially expressed  
127 in both sensitive populations between treatments, with an overwhelming majority shared  
128 across populations (Figure S2A). Shared upregulated genes were enriched for 18 GO terms  
129 related to stress (Table S1). Further, the overall major difference in expression between  
130 susceptible and tolerant populations in the zinc treatment was the lack of this stress  
131 response in tolerant populations. In total, 18,343 genes were differentially expressed in  
132 both pairs of tolerant and sensitive populations in the zinc (Figure S2B), which were  
133 enriched for 22 stress-related GO terms (Table S2). Of these genes, 83.7% were ancestrally  
134 plastic (i.e., also differentially expressed between treatments in both sensitive populations),  
135 but only 3.6% showed derived plasticity (i.e., were also differentially expressed between  
136 treatments in both tolerant populations; Figure S2C). This reveals a significant and

137 widespread disruption to transcription in sensitive plants, consistent with the broad impact  
 138 of zinc toxicity on cellular processes (Singh *et al.*, 2016). It also indicates that, in general,  
 139 greater transcriptomic perturbations in ancestral populations exposed to new environments  
 140 may be driven by general stress responses (Koch & Guillaume, 2020; Swaegers *et al.*,  
 141 2020; Josephs *et al.*, 2021; Bittner *et al.*, 2021).

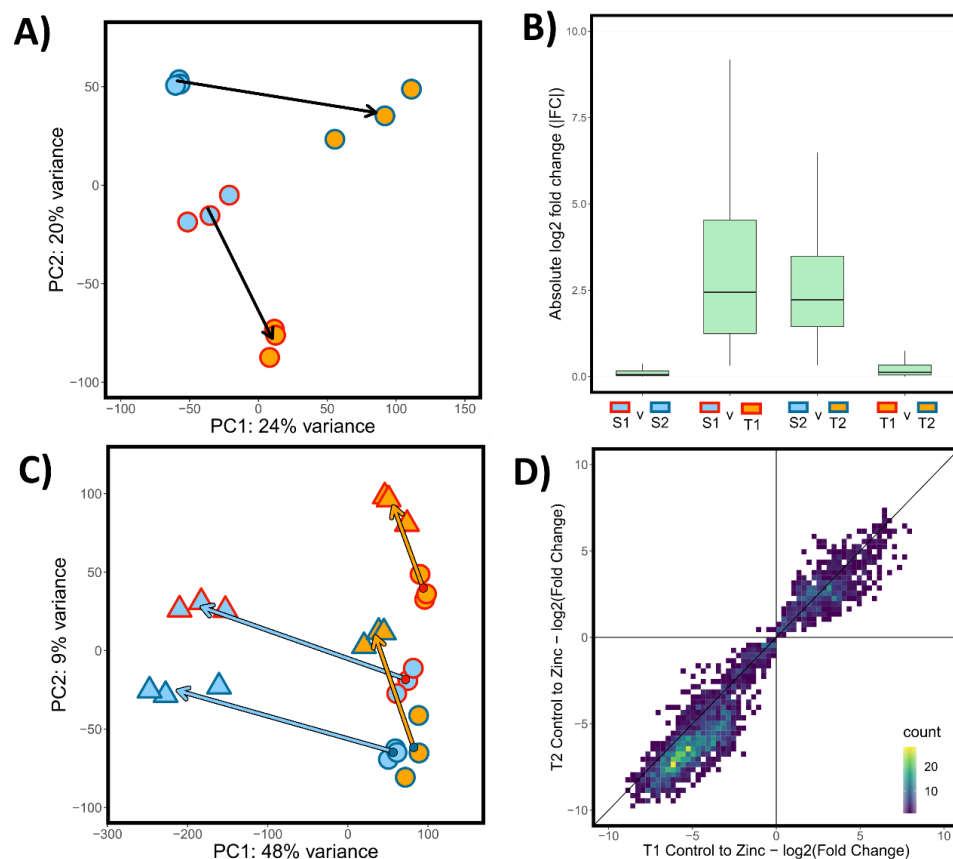

142 **Figure 1: Parallel constitutive and plastic changes in tolerant populations.**  
 143 A) Principal components analysis (PCA) of variance-transformed counts of populations in control treatments.  
 144 Point fill corresponds to population zinc tolerance (orange = tolerant, blue = sensitive), point border  
 145 corresponds to geographic pair (red = 1, dark blue = 2). Arrows are drawn from the centroid of each  
 146 susceptible population (S1 and S2) to the centroid of their corresponding tolerant population (T1 and T2  
 147 respectively). B) Boxplots of absolute values of log2 transformed fold changes (|FC|; y axis) between pairs  
 148 of populations (x axis) in the control treatment for CEC genes (i.e., 413 genes showing parallel expression  
 149 differences in the control treatment). Points above 97.25th and below 2.25th percentiles not plotted. C) PCA  
 150 of variance-transformed counts of all populations in both treatments across all genes. Circles correspond to  
 151 control treatment, triangles to zinc treatment. Point fill and border as in panel 2A. Arrows are drawn from the  
 152 centroid of each population in the control treatment to the centroid of each population in the zinc treatment  
 153 (arrowhead). Arrow fill corresponds to zinc tolerance level and arrow base point fill corresponds to  
 154 geographic pair (colours as in Fig. 2A). D) Heatmap of log2 transformed shrunken fold changes between  
 155 control and zinc treatments for genes that were differentially expressed between control and zinc in both T1  
 156 (x-axis) and T2 (y-axis; i.e. DP genes).  
 157

### 158 **Rapid evolution of highly parallel gene expression changes**

159 *Silene uniflora* has independently colonised mines and evolved tolerance to the very high  
 160 levels of zinc (2,400-48,100ppm) in the contaminated soils (Baker, 1974, 1978;

161 Papadopulos *et al.*, 2021). Given that this phenotype has evolved in parallel as a result of  
162 a strong selection pressure, we also expected a component of the transcription profiles to  
163 show parallel changes in tolerant populations. In the control treatment, principal  
164 component analysis of transcriptome-wide gene expression levels revealed separation of  
165 populations by zinc-tolerance (i.e., tolerant vs. sensitive) on PC1 and by geographic origin  
166 (i.e., T1 and S1 vs. T2 and S2) on PC2 (Fig. 1A). Within-population variation was low  
167 relative to between populations/treatments. In these benign control conditions, the  
168 trajectories of whole transcriptome profile evolution were divergent and almost orthogonal  
169 rather than parallel (*sensu* Bolnick *et al.* 2018).

170 However, 2,198 and 4,448 genes were differentially expressed in control conditions  
171 between T1 and S1, and T2 and S2 respectively, of which 566 were shared (Fig. S2D). We  
172 categorised 413 of these shared genes as displaying parallel constitutive evolutionary  
173 changes of expression (CEC genes); these were differentially expressed in both tolerant-  
174 sensitive pairs *and* had expression differences in the same direction (i.e., increased or  
175 decreased expression in both T1 vs. S1 and T2 vs. S2). Genes with expression shifts in the  
176 same direction are more likely to be the result of parallel adaptation to similar selection  
177 pressures across the mines (Fig. S3). With RNA-seq data, the extent to which pairs of  
178 populations exhibit similar gene expression levels can be quantified by comparing the  
179 absolute per-gene log<sub>2</sub> transformed shrunken fold-changes (FC) between them (see  
180 Methods for rationale). A small median |FC| for a gene set indicates high similarity between  
181 a pair of populations in the expression levels of those genes. In control conditions,  
182 transcriptome-wide expression values of tolerant populations were less similar than the  
183 coastal populations were to each other - ( $|FC|_{S1-S2} = 0.032$  vs  $|FC|_{T1-T2} = 0.098$ ; p-value <  
184  $2.2 \times 10^{-16}$ ; Pairwise Wilcoxon Rank Sum Test; Fig. S4). The CEC genes had similar  
185 expression values in sensitive populations (CEC|FC|<sub>S1-S2</sub> = 0.055), but expression was also  
186 highly similar in tolerant populations (CEC|FC|<sub>T1-T2</sub> = 0.12), despite substantial expression  
187 divergence and genome-wide genetic differentiation from the nearest coastal populations  
188 (Fig. 1B; mean  $F_{ST-T-S} = 0.36$ ; 38). In other words, for the 413 CEC genes, parallel  
189 evolution in mine populations produced expression similarity comparable to that observed  
190 between sensitive populations - which is the product of shared ancestry, gene flow, drift  
191 and selection.

192 Unlike in the control treatment, there was a high degree of parallelism in the response of  
193 tolerant populations to zinc treatment across the whole transcriptome (Fig. 1C). The  
194 evolutionary trajectories from sensitive to tolerant populations in the zinc are almost  
195 completely parallel, as are the tolerant populations responses to zinc relative to the control.  
196 This suggests that genes with significant expression responses to zinc in both tolerant  
197 populations are likely to play some role zinc tolerance. Of the 2,957 and 4,837 genes  
198 displaying expression differences between treatments in T1 and T2 respectively, 2,475  
199 were shared (Figure S2A). These shared genes had highly correlated expression shifts (log<sub>2</sub>  
200 fold changes between treatments; linear model slope = 1.0773, p <  $2.2 \times 10^{-16}$ , adjusted R<sup>2</sup>  
201 = 0.936, Fig. 1D). 2,472 of these genes consistently displayed derived plasticity (DP genes;  
202 i.e., – they were differentially expressed between treatments in *both* populations, with  
203 expression shifting in the same direction). Many of these DP genes (82%) were also  
204 differentially expressed between treatments in both susceptible populations and may  
205 constitute a stress response that is represent a partially inherited from their coastal

206 ancestors. Nevertheless, there were also convergent changes in expression levels in these  
 207 genes between tolerant populations. Expression profiles for DP genes were similar across  
 208 all populations in the control treatment (as summarised using PCA; Fig. S5), but, when  
 209 exposed to zinc DP gene expression in tolerant and sensitive plants diverged (Fig. S5).  
 210 Unlike in the susceptible populations, similarity between tolerant populations in DP genes  
 211 increased in the zinc compared to the control (Fig. S6), consistent with previous studies  
 212 indicating that phenotypic plasticity can result in increased phenotypic parallelism (Oke *et*  
 213 *al.*, 2016).  
 214

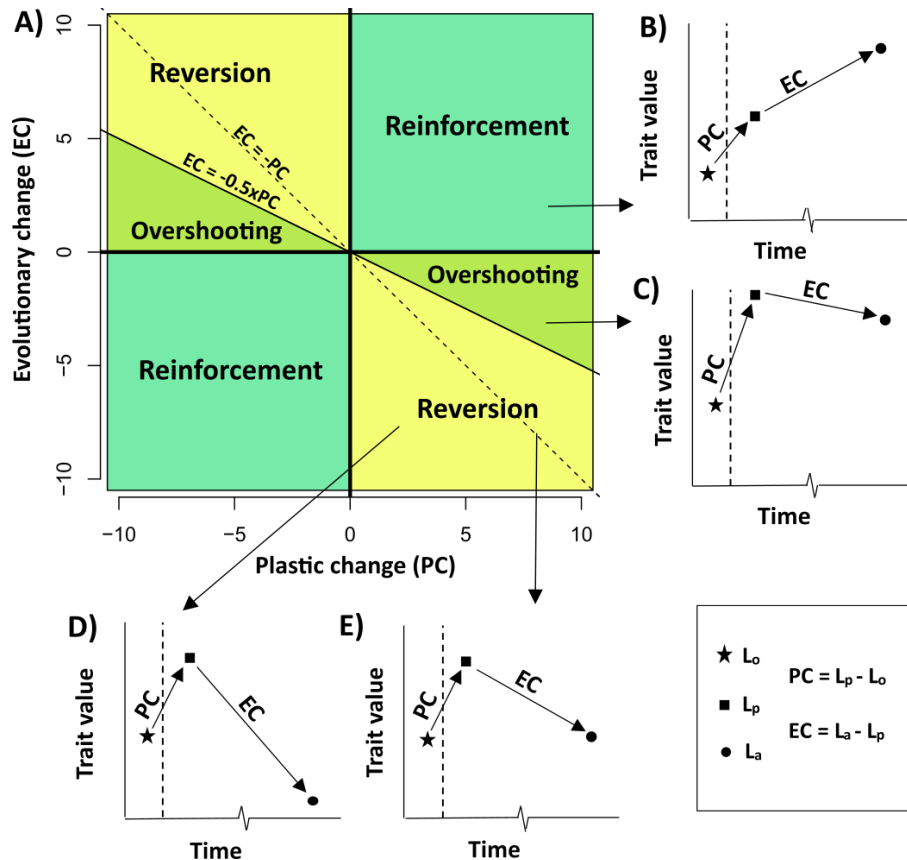

215  
 216

217 **Figure 2: Conceptual Overview of Evolutionary Responses to Ancestral Plasticity.**

218 When an ancestral population reaches a novel environment, an immediate plastic change (PC) moves the trait  
 219 from an initial value of  $L_0$  in the old environment to  $L_p$  in the new environment. As populations adapt over  
 220 time, a further evolutionary change (EC) shift  $L_p$  to a new value of  $L_a$ . A) The evolutionary response to  
 221 ancestral plasticity can be divided into three categories depending on the values of PC and EC. B-E) Cartoon  
 222 representations of scenarios – dashed line represents transition from ancestral to novel environment and  
 223 associated trait shift, PC. B) Reinforcement occurs when the subsequent EC is in the same direction as PC.  
 224 C) Overshooting occurs when PC has moved the trait value closer to the new optimum (i.e.,  $L_a$  is closer to  
 225  $L_p$  than  $L_0$ ). In this scenario, EC is in the opposite direction to PC, but  $|EC| < 0.5 \times |PC|$ . D-E) Reversion occurs  
 226 when the optimum in the new habitat is nearer to the value of the unstressed ancestor in its home environment  
 227 than the ancestor's response (i.e.,  $L_a$  is closer to  $L_0$  than  $L_p$ ), so EC is in the opposite direction to PC, but  
 228  $|EC| < 0.5 \times |PC|$ . Reversion can include the restoration of the ancestral state in the old environment ( $|EC| = |PC|$ )  
 229 or move beyond this value in the opposite direction ( $|EC| > |PC|$ ). Reinforcement and overshooting suggest  
 230 that ancestral plasticity was adaptive, whereas reversion indicates it was maladaptive.

231 There were six times as many genes with derived plasticity (DP genes) as with  
232 constitutive differences between ecotypes (CEC genes). In the literature, there is significant  
233 variability across taxa in the ratios of constitutive to plastic differences associated with  
234 local adaptation (Josephs *et al.*, 2015; Heckel *et al.*, 2016; Gugger *et al.*, 2017; Passow *et al.*,  
235 2017; Feiner *et al.*, 2018; Gould *et al.*, 2018; Swaegers *et al.*, 2020; Fischer *et al.*,  
236 2021). This may be a function of the degree to which a stressor varies temporally and  
237 spatially within a habitat. Soil metal content does vary considerably over small spatial  
238 scales and the sessile nature of *S. uniflora* may make plastic responses that can be tweaked  
239 to the precise local zinc concentrations more advantageous than constitutive changes to  
240 expression (Baker, 1974; Deram *et al.*, 2006; Bidar *et al.*, 2009). Only 26 genes were  
241 categorised as both CEC and DP – a relatively small overlap compared to studies in  
242 animals, which have mainly found that large proportions of plastic genes differ between-  
243 ecotypes even in the absence of the stressor (Gleason & Burton, 2015; Li *et al.*, 2018).  
244 Partial upregulation in benign conditions may be beneficial when environmental stressors  
245 vary rapidly over time (Rivera *et al.*, 2021), which could be the case for stressors in studied  
246 animals, but is unlikely to be the case for soil metal concentrations encountered by sessile  
247 plants.

248 Overall, these results suggest that highly parallel patterns of differential gene  
249 expression across evolutionary replicates can be acquired very early in adaptation and over  
250 very short timescales. This is true for both the identity of the genes and the magnitude of  
251 expression shifts. Previous experimental evolution studies in *Drosophila*, *Tribolium* and  
252 *Ipomoea* have demonstrated the evolution of gene expression plasticity in response to  
253 heterogenous environments within 22–130 generations (Huang & Agrawal, 2016; Koch &  
254 Guillaume, 2020; Mallard *et al.*, 2020; Josephs *et al.*, 2021). We demonstrate that this can  
255 also occur in wild plant populations in comparable timeframes and is repeatable between  
256 independent colonisations of a novel habitat.

257

### 258 **Ancestral plasticity is generally reversed during adaptation**

259 To understand the relationship between ancestral plasticity and adaptation, a well-  
260 established approach is to investigate mean differences in gene expression between  
261 ancestral populations in their home/control environment ( $L_o$ ), in a new environment ( $L_p$ ),  
262 and in adapted populations in the new environment [ $L_a$ ; see Fig. 2B-E; (Ghalambor *et al.*,  
263 2015; Ho & Zhang, 2018, 2019; Fischer *et al.*, 2021)]. To make inferences about the role  
264 of ancestral plasticity during adaptation, we can compare the direction and magnitude of  
265 the initial plastic response of an ancestral population when it is exposed to a new  
266 environment (ancestral plasticity/plastic change,  $PC = L_p - L_o$ ) with the subsequent change  
267 in expression between the ancestral population, and an adapted population, in the new  
268 environment [evolutionary change,  $EC = L_p - L_o$ ; (Ghalambor *et al.*, 2015; Ho & Zhang,  
269 2018)]. The relationship between PC and EC (i.e. the evolutionary response to ancestral  
270 plasticity) can be characterised in three ways: i) “reinforcement”, where the initial PC and  
271 subsequent EC both move expression in the same direction towards the new optimum (Fig.  
272 2A, B); (ii) “overshooting” where PC takes expression beyond the new optimum and EC  
273 then adjusts expression in the opposite direction, (Fig. 2A, C); and iii) “reversions” where  
274 the new optimum is closer to the level of the ancestor in its home environment, so EC  
275 largely counteracts the change observed in PC (Fig. 2A, D-E). During both reinforcement

276 and overshooting, the ancestral PC moves expression closer to the new optimum, so both  
277 can be interpreted as ancestral plasticity facilitating adaptation to the new environment.  
278 Conversely, reversions are likely to be the outcome when ancestral plasticity is  
279 maladaptive.

280 We evaluated the degree of reversion, reinforcement and overshooting in our  
281 transcriptome dataset. To avoid spurious assignment to these categories resulting from very  
282 small expression changes, only genes showing substantial changes in PC and EC ( $|PC|$  &  
283  $|EC| > 0.2 * L_0$ ; 76.7% of all genes;) were placed into these three categories (Fig. 2A), as in  
284 previous studies (Ghalambor *et al.*, 2015; Ho & Zhang, 2018; Fischer *et al.*, 2021). We  
285 first considered these patterns transcriptome-wide, to establish the general pattern of  
286 evolutionary responses to ancestral plasticity, regardless of these genes' role in conferring  
287 adaptation. Across the entire transcriptome, 87.7% of genes showed reversion, with only  
288 6.9% showing reinforcement and 5.3% overshooting. This indicates that, in the vast  
289 majority of cases, ancestral plasticity does not move expression closer to the new optimum  
290 (Figs. 3A, S7). Ho & Zhang (2019) identified that reversions may be overrepresented due  
291 to the presence of  $L_p$  in calculations of PC and EC (Fig. 2), recommending parametric  
292 bootstrapping to reduce this bias. Bootstrapping (see Methods) produced very similar  
293 proportions of reversions, overshooting and reinforcement across all gene sets, so this bias  
294 had minimal impact on our findings (Table S3). Our transcriptome-wide results are  
295 consistent with previous studies in animals and microorganisms which generally find that  
296 reversion is dominant (Ho & Zhang, 2018; Koch & Guillaume, 2020; Swaegers *et al.*,  
297 2020). However, the subsequent evolutionary response (EC) in many of these genes are  
298 likely to be consequences of adaptation (reduced stress/transcriptional disruption in mine  
299 populations due to their zinc tolerance, resulting in reversion of ancestral stress responses)  
300 rather than it causes (i.e., not directly involved in conferring zinc tolerance).

301 Genes that plausibly have a role in repeated adaptation to zinc contamination (DP  
302 and CEC genes) make up only 5.0% of the transcriptome. The vast majority of genes  
303 displaying substantial PC and EC across the transcriptome undergo high stress responses  
304 in sensitive plants in zinc and remain at unstressed levels in tolerant populations in the zinc  
305 treatment. Examining the evolutionary response to ancestral plasticity across the  
306 transcriptome provides an indication of the overall likelihood that an ancestral plastic  
307 response moves expression closer to the new optimum in the new zinc-contaminated  
308 environment - which our results indicate is low, as evidenced by the large number of  
309 subsequent evolutionary reversions (Fig. 3A). However, it does not identify whether this  
310 likelihood increases for genes directly involved in adaptation, which is arguably more  
311 informative in understanding the role of plasticity in adaptation to new environments.

312

### 313 **Ancestral plasticity less likely to be reversed in adaptive genes**

314 To understand whether ancestral plasticity facilitates adaptive evolution, we considered the  
315 proportion of genes undergoing reversion, reinforcement and overshooting in the DP and  
316 CEC gene sets. Among DP genes showing substantial PC and EC (39% of the total), 70.1%  
317 underwent reversion (i.e., the ancestral plastic response took expression further away from  
318 the new optimum), 16.3% experienced reinforcement and 12.8% overshooting (Figs. 3B,  
319 S7). These results indicate that even among genes likely to be directly involved in zinc  
320 tolerance, most evolutionary responses involve reversion of the plastic response. However,



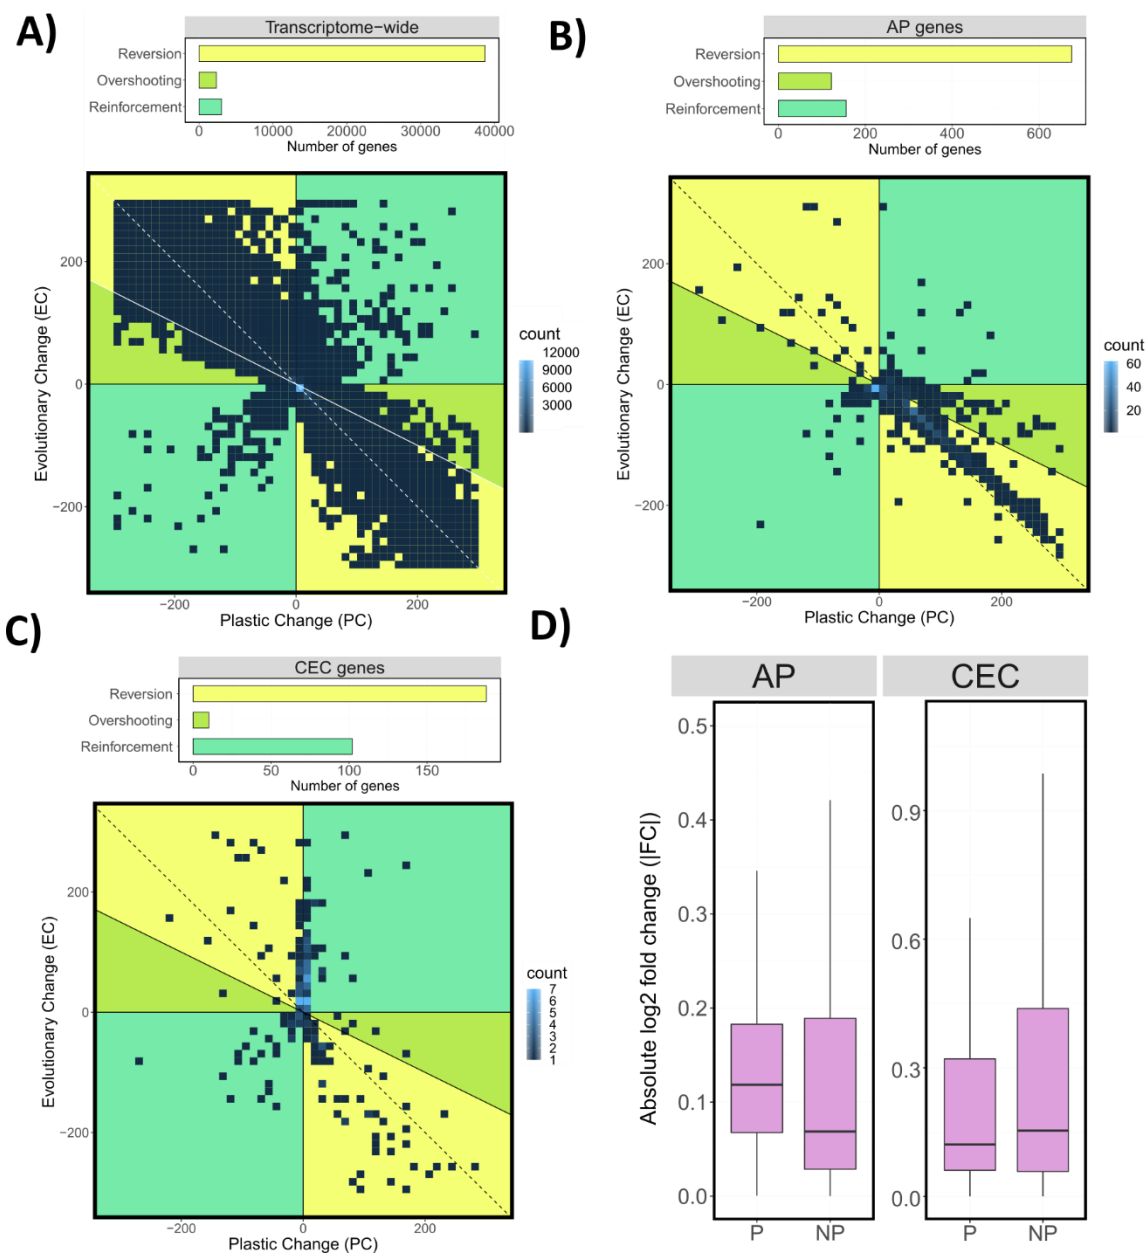

321  
 322 **Figure 3: Impact of ancestral plasticity on adaptive evolution and expression**  
 323 **convergence.** For each of A) the entire transcriptome, B) derived plasticity (DP) genes, and C) genes with  
 324 constitutive expression differences (CEC): i) barplots displaying numbers of genes displaying reversion,  
 325 overshooting and reinforcement; and ii) heatmaps of plastic change (PC) vs. evolutionary change (EC) for  
 326 each gene. Plots display at least 50% of the genes in each category (see Fig. S6 for plots of entire datasets).  
 327 D) Boxplots of absolute values of log<sub>2</sub> transformed fold changes (FCI; y axis) between tolerant populations  
 328 in the zinc for genes with derived plasticity (DP genes) or constitutive changes (CEC genes), and either  
 329 substantial ancestral plasticity (P) or no ancestral plasticity (NP).

330 significantly more instances of the ancestral plastic response move expression closer to the  
 331 new optimum than in the transcriptome as a whole (reversion + overshooting = 29.1% for  
 332 DP vs. 12.2% for the whole transcriptome,  $p < 2.2 \times 10^{-16}$  binomial two-sided test). Few DP  
 333 genes display low PC and high EC (Fig. 3B), which indicates that it is difficult/rare to

334 evolve plasticity *de novo* during adaptation, without existing ancestral plasticity. This  
335 shows that ancestral plasticity plays an important role in colonisation of new environments  
336 with some plastic responses being enhanced or only partially reversed during adaptation.  
337 Furthermore, a majority of all DP genes (53.0%) display substantial PC but EC below the  
338 threshold value, which indicates that a significant proportion of the adaptive response  
339 involves ancestral plastic responses which are not substantially altered following  
340 adaptation (i.e., they are pre-adaptations).

341 Adaptation to zinc contamination has also produced constitutive gene expression  
342 differences between tolerant and sensitive populations that persist even in the absence of  
343 zinc (CEC genes). Ancestral plasticity may facilitate the evolution of differences by  
344 moving expression closer to the new optimum, which could then be canalised to produce  
345 constitutive adaptive changes (Heckel *et al.*, 2016). Among CEC genes showing substantial  
346 PC and EC (73% of the total), only 62.7% show signs of reversion, with 34.0% undergoing  
347 reinforcement and 3.3% overshooting (Figs. 3C, S7). This is significantly higher than in  
348 either DP genes (34.0% vs. 16.3%,  $p < 9.3 \times 10^{-14}$ ; Two-Tailed Binomial Test) or  
349 transcriptome-wide (34.0% vs. 6.9%,  $p < 2.2 \times 10^{-16}$ ; Two-Tailed Binomial Test). In most  
350 cases, the PC of CEC genes is small relative to EC (Fig 3C); high plasticity is more likely  
351 to be deleterious in large-effect genes, whereas lower levels of plasticity may afford  
352 individuals sufficiently high fitness to colonise the new environment without incurring  
353 fitness costs in other situations. The increase in reinforcement among CEC genes points to  
354 canalisation of enhanced ancestral plastic responses making an important contribution to  
355 the evolution of constitutive changes.

356 Why is there a difference in reinforcement between DP and CEC genes? For CEC  
357 genes, there may be little cost to maintaining expression at extreme values in the face of  
358 such strong selective forces, even when zinc levels are low. If this is the case, constitutively  
359 expressed genes may be expressed at values commensurate with the most extreme  
360 environment that could plausibly be encountered, which is then consistent with higher  
361 levels of reinforcement in CEC genes. Conversely, DP genes may carry a fitness cost for  
362 being expressed at an inappropriate/inaccurate level for a given concentration of zinc and  
363 have retained, or fine-tuned, the ancestral level of plasticity. Consistent with fine-tuning of  
364 the ancestral response DP genes, where ancestral plasticity took expression closer to the  
365 adapted level, there is an approximately equal frequency of reinforcement and  
366 overshooting.

367 Other studies have looked for a significant role for ancestral plasticity in producing  
368 constitutive expression differences by establishing a positive correlation between ancestral  
369 plasticity (which they define as  $L_p/L_o$ ) and evolutionary change in control conditions  
370 [defined as  $L_c/L_o$ , where  $L_c$  is the level of the adapted population in the ancestral  
371 environment (Josephs *et al.*, 2021; Bittner *et al.*, 2021)]. However, the common  
372 denominator of  $L_o$  in both variables would tend to produce a positive correlation (Kenney,  
373 1982), potentially making these results unreliable. Ghalambor *et al.* (2015) found most  
374 constitutive differences had evolutionary changes in the opposite direction to ancestral  
375 plasticity (reversion and overshooting were not distinguished), but whether there was an  
376 increase compared to the transcriptome-wide pattern was not assessed. Here, we  
377 demonstrated that although most ancestral plasticity is maladaptive, ancestral plasticity that  
378 does move expression closer to the new optimum contributes significantly to adaptation.

379

### 380 **Ancestral plasticity not necessary for substantial gene expression convergence**

381 Given this evidence of ancestral plasticity contributing to adaptation, the question of its  
382 importance for parallelism in adaptation arises. As demonstrated above, ancestral plasticity  
383 that moves expression closer to the new optimum (reinforcement and overshooting) is  
384 overrepresented in gene sets displaying signs of parallel changes compared to the  
385 transcriptome as a whole. Such plasticity may also increase the propensity of genes to be  
386 repeatedly recruited during adaptation. Unlike the shared CEC genes, which had relatively  
387 low rates of reversion (62.7%), genes differentially expressed in the control in only one  
388 population pair, were more likely to show reversion (77.6% and 81.8% respectively; Table  
389 S4). Similarly, genes with between-condition changes in only T1 or T2 were also more  
390 likely to show reversion (89.9% and 77.6% respectively; Table S4) than genes displaying  
391 this behaviour in both (i.e., DP genes; 70.8%). In other words, genes repeatedly recruited  
392 during adaptation are more likely to have had ancestral plasticity that moved expression  
393 closer to the new optimum, than those that were only recruited in one event.

394 In addition to affecting the probability of gene recruitment during adaptation,  
395 ancestral plasticity may also affect the degree of expression convergence in repeatedly  
396 recruited genes. For DP genes with no substantial ancestral plasticity ( $|PC| < 0.2 * L_0$ ),  
397 expression values in tolerant populations in zinc were marginally more similar than for DP  
398 genes with ancestral plasticity ( $|FC|_{NOPLAST} = 0.069$ ,  $|FC|_{PLAST} = 0.12$ ,  $p = 0.035$ , Pairwise  
399 Wilcoxon Rank Sum Test; Fig. 3D). CEC genes with no substantial ancestral plasticity  
400 developed expression similarity equal to that of CEC genes with substantial ancestral  
401 plasticity ( $|FC|_{NOPLAST} = 0.15$ ,  $|FC|_{PLAST} = 0.12$ ,  $p = 0.41$ , Fig. 3D). This indicates that genes  
402 lacking ancestral plasticity can rapidly evolve plastic responses with comparable levels of  
403 expression convergence to those genes where plasticity is at least partly inherited from  
404 zinc-sensitive ancestors. Overall, the results show that ancestral plasticity can facilitate the  
405 repeated recruitment of genes during adaptation, but it does not facilitate greater  
406 convergence in expression levels of these genes.

407

### 408 **Convergent zinc tolerance pathways**

409 Examining sets of shared genes with expression patterns consistent with a role of  
410 adaptation sheds light on the mechanisms underlying zinc tolerance. CEC genes that were  
411 upregulated by tolerant plants relative to sensitive plants included homologs of *A. thaliana*  
412 *zinc transporter 1* ZIP1, which mediates the uptake of zinc from the rhizosphere (Grotz *et*  
413 *al.*, 1998), *heavy metal atpase 2* [HMA2, a plasma membrane protein that transports zinc  
414 from cells; (Hussain *et al.*, 2004; Eren & Argüello, 2004)] and *metal tolerance protein 1*  
415 [MTP1, which sequesters zinc into vacuoles and controls zinc accumulation in roots; (Van  
416 Zaal *et al.*, 1999; Kobae *et al.*, 2004)] These are upregulated in zinc hyperaccumulators  
417 such as *Arabidopsis halleri* (Assuncao *et al.*, 2001) and when overexpressed confer  
418 increased metal accumulation and tolerance (Van Zaal *et al.*, 1999; Verret *et al.*, 2004; Das  
419 *et al.*, 2016). The function of these genes is consistent with increased zinc accumulation in  
420 the roots of zinc-tolerant *S. uniflora* populations (Baker, 1978; Papadopoulos *et al.*, 2021).  
421 The DP genes that were upregulated in response to zinc were enriched for GO terms  
422 including “toxin catabolic process” and “glutathione metabolic process” (Table S5). These  
423 terms were associated with the same four genes, which are homologs to *A. thaliana*

424 glutathione-s-transferases [GSTs; which have an important role in xenobiotic  
425 detoxification (Martinoia *et al.*, 1993)]. Overexpression of GSTs results in enhanced zinc  
426 and cadmium tolerance (Liu *et al.*, 2013; Zhang *et al.*, 2019). This indicates that genes  
427 which have been repeatedly recruited for a role in zinc tolerance across multiple species  
428 (Singh *et al.*, 2016) have also undergone repeated gene expression changes in zinc-tolerant  
429 populations over a few hundred generations.

430

### 431 **Conclusions**

432 Highly parallel gene expression phenotypes have evolved in *S. uniflora* during the repeated  
433 colonisation of zinc-contaminated mines, despite the short timescales involved and a lack  
434 of gene flow between the tolerant populations (Papadopulos *et al.*, 2021). We show that  
435 genes displaying beneficial patterns of ancestral plasticity are overrepresented in these  
436 highly parallel gene sets, confirming a role for ancestral plasticity in facilitating repeated  
437 adaptation to novel environments. The results of our experiment and others confirm that  
438 most ancestral plasticity is non-adaptive (Ho & Zhang, 2018; Koch & Guillaume, 2020;  
439 Fischer *et al.*, 2021). Nevertheless, the considerable proportion of genetically based  
440 adaptive differences that co-opt ancestral plastic responses, suggests that it is a major force  
441 in rapid adaptation. Despite a role for ancestral plasticity in enhancing the recruitment of  
442 genes, it does not result in an increased level of phenotypic convergence at the level of  
443 gene expression compared to genes showing no significant ancestral plasticity. In other  
444 words, ancestral plasticity only facilitates parallel evolution at certain levels of biological  
445 organisation. Overall, our results indicate that genetic assimilation and modification of  
446 ancestral plastic responses play an important role in adaptation to novel environments and  
447 may be partially responsible for parallelism in gene expression during local adaptation.

448

### 449 **Methods**

#### 450 1. Plant materials and experimental procedure

451 Populations T1, S1, T2 and S2 correspond to WWA-M, WWA-C, ENG-M and ENG-C in  
452 Papadopulos *et al.*, 2021 - seeds were collected as described in that study. Seeds from three  
453 individuals per population were germinated and cuttings propagated at ten weeks (See SI  
454 Appendix for conditions). Cuttings were transferred to deep water culture tanks containing  
455 dilute Hoagland's solution. Cuttings from each individual were included in each tank and  
456 there was approximately equal representation of populations per tank. After one week of  
457 acclimation, the hydroponic solution was replaced with fresh solution in 50% of tanks  
458 (control treatment) and solution adjusted to 600 $\mu$ M ZnSO<sub>4</sub> solution in the remaining 50%  
459 (zinc treatment). Eight days later, roots from each individual cutting were flash frozen in  
460 liquid nitrogen and stored at -80°C. For each individual within a treatment, roots of three  
461 cuttings were pooled, homogenised and RNA extracted using a Qiagen RNeasy Plant Mini  
462 Kit (see SI Appendix for full experimental and extraction conditions). RNA-seq libraries  
463 were sequenced at the Beijing Genomics Institute in Hong Kong on a BGISEQ500 with  
464 100bp paired-end reads (mean insert size 161bp), producing 25.1-26.0M read pairs per  
465 sample (Table S6).

466

#### 467 2. Transcriptome assembly and transcript quantification

468 After quality control and trimming of sequencing reads (see SI appendix for details), *de*  
469 *novo* transcriptome assembly was performed using Trinity v2.10.0 (Haas *et al.*, 2013) using  
470 data from one individual per population per treatment (Table S6). After filtering (see SI  
471 Appendix for details) 57,541 genes were retained for downstream analysis. Completeness  
472 was assessed using the Eudicots dataset in BUSCO v.4.0.5 (Seppey *et al.*, 2019) - 75%  
473 complete (72.2% single copy, 2.8% duplicated), 8.4% fragmented, 16.6% missing.  
474 Transcripts were annotated using hmmer-3.3 (Mistry *et al.*, 2013) blastp and trinotate  
475 v3.2.1 (Bryant *et al.*, 2017; see SI Appendix for details).

476

### 477 3. Differential gene expression

478 Abundance estimates for transcripts were summarised at the gene level using tximport  
479 v.1.4.2 (Soneson *et al.*, 2015). Gene expression analysis was performed using DESeq2  
480 v1.26.0 (Love *et al.*, 2014). Genes with low counts (<10) across all samples were removed.  
481 Variance-stabilising transformed counts for 57,476 genes across all conditions were  
482 calculated and used in downstream analysis. Principal components analysis of these counts  
483 for i) all genes in control conditions (Figure 1A), ii) all genes across all conditions (Figure  
484 1D) and iii) for DP genes (Figure S4) were calculated using the R prcomp function.

485 Genes differentially expressed between two populations within a treatment (control  
486 or zinc) were identified using DESeq2's in-built models with a single combined factor for  
487 population + condition (adjusted p-value = 0.05). Differentially expressed genes between  
488 T1 and S1, and T2 and S2 were identified in i) control and ii) zinc treatments. CEC genes  
489 were defined as those differentially expressed between both T1 and S1 in the control, and  
490 T2 and S2 in the control, in the same direction (i.e. both increasing, or decreasing, in T1  
491 relative to S1 and T2 relative to S2). For between-treatment, within-population  
492 comparisons, a model with terms “~ Population + Population:Individual +  
493 Population:Condition” was fitted to account for individual-specific variation which could  
494 be accounted for due to the use of cloned individuals. Genes differentially expressed  
495 between control and zinc were identified for S1, S2, T1 and T2. DP genes were defined as  
496 those differentially expressed between conditions in both T1 and T2 in the same direction  
497 (i.e. both increasing, or both decreasing, from control to zinc treatment). The significance  
498 of overlaps between sets of differentially expressed genes was determined using Fisher's  
499 Exact test (Supplementary Table S7). Gene Ontology enrichment analysis of gene sets was  
500 performed using GOseq v1.38.0 (Young *et al.*, 2010) with a false discovery rate of 0.05.

501 Quantification of fold changes of genes between populations and/or treatments used  
502 empirical bayes shrinkage, calculated with the lfcShrink() function in DESeq2 (Stephens,  
503 2017). Values of |FC| were calculated for each gene as the absolute log<sub>2</sub> fold change  
504 between pairs of population/treatment groups (e.g. T1 and T2 in the zinc) for a given set of  
505 genes. The sign of the log<sub>2</sub> fold change depends on the order of comparisons being made  
506 (e.g. a value of +1 between T1 and T2 is equivalent of -1 between T2 and T1); the absolute  
507 value must be taken to meaningfully summarise the difference in expression levels (e.g.  
508 the mean of -2 and +2 would be lower than that of 0.5 and 0.6). The median was used to  
509 summarise the values of |FC| as their distribution is highly skewed. Pairwise Wilcoxon  
510 signed-rank tests with Benjamini-Hochberg correction were used to detect significant  
511 differences in the distributions of |FC| between different pairs of population/treatment  
512 groups.

513

#### 514 4. Classifying responses to ancestral plasticity

515 To classify evolutionary responses to ancestral plasticity in the transcriptome-wide, DP  
516 and CEC gene sets, the following parameters were calculated for each gene:  $L_o$  – mean  
517 expression value across S1 and S2 in control;  $L_p$  – mean expression value across S1 and  
518 S2 in zinc;  $L_a$  – mean expression value across T1 and T2 in the zinc. These were used to  
519 calculate the initial plastic change ( $PC = L_a - L_p$ ) and subsequent evolutionary change ( $EC$   
520  $= L_p - L_o$ ) as in Ghalambor *et al.* (2015) for each gene. Only genes having substantial  
521 plastic and evolutionary change (defined as  $|EC|$  and  $|PC| > 0.2 * L_o$ ), were assigned as  
522 undergoing reversion, reinforcement or plasticity – very small values of EC or PC due to  
523 measurement error would lead to spurious assignment of genes to categories (Ho & Zhang,  
524 2018). Genes were assigned to one of three categories of evolutionary response to ancestral  
525 plasticity : i) Reinforcement: if  $EC * PC > 0$ ; ii) Overshooting: if  $EC * PC < 0$  and  $|EC| <$   
526  $0.5 * |PC|$ ; or iii) Reversion: if  $EC * PC < 0$  and  $|EC| > 0.5 * |PC|$  (Koch & Guillaume, 2020).  
527 Significant differences in the relative proportions of these categories between sets of genes  
528 (e.g. CEC genes compared to the transcriptome as a whole) were assessed using a two-  
529 tailed binomial test. Parametric bootstrapping of gene assignment to these categories  
530 following recommendations in Ho & Zhang (2019) was implemented in R and repeated  
531 100 times per gene (see SI Appendix for details) but showed little difference from non-  
532 bootstrapped results (Table S3), values for the latter were used throughout. For genes  
533 showing DP/CEC expression patterns but in T1/S1 or T2/S2 only, values of  $L_o$ ,  $L_p$ ,  $L_a$ , EC  
534 and PC were only calculated using the samples from T1/S1 and T2/S2 separately (Table  
535 S4) and categorized based on these values. Assignment of categories for transcriptome-  
536 wide, CEC and DP genes were also calculated using T1/S1 and T2/S2 separately; these did  
537 not differ substantially between evolutionary replicates or the combined calculations  
538 (Table S4).

539

#### 540 5. Genotyping

541 For genotyping, cleaned reads were mapped to the transcriptome using HISAT2 v2.2.1  
542 (Kim *et al.*, 2019). Genotypes were called using bcftools (See SI Appendix for details). A  
543 phylogenetic tree was constructed based on 24,982 SNPs using SNPhylo v20140701 (Lee  
544 *et al.*, 2014).

545

#### 546 **Materials and Data**

547 Raw reads are uploaded to NCBI SRA, accession number PRJNA706929. The *de-novo*  
548 assembled transcriptome is uploaded to NCBI Genbank TSA, accession number  
549 GXXXXXX.

550

551 **Author Contributions:** ASTP conceived and supervised the research. ASTP and DW  
552 designed the experiment with contributions from all authors. ASTP, RJS, JL conducted  
553 fieldwork. DW and JAH conducted experimental and laboratory work. DW analysed the  
554 data with contributions from ASTP, OGO, ARE, LTD and AJH. DW and ASTP wrote the  
555 manuscript and all authors commented on the final version.

556

557 **Acknowledgements:** We thank Natural Environment Research Council (NERC) for  
558 funding (NE/R001081/1), Aaron Comeault and Michael Chester for valuable discussion,  
559 Nicholas Welsby and Wendy Grail for laboratory support, and Llinos Hughes and Mark  
560 Hughes for greenhouse support. LTD is supported by a Natural Environment Research  
561 Council Independent Research Fellowship (NE/T011025/1).

562

## 563 **References**

- 564 **Assuncao AGL, Martins PDC, De Folter S, Vooijs R, Schat H, Aarts MGM. 2001.**  
565 Elevated expression of metal transporter genes in three accessions of the metal  
566 hyperaccumulator *Thlaspi caerulescens*. *Plant, Cell and Environment* **24**: 217–226.
- 567 **Baker AJM. 1974.** Heavy metal tolerance and population differentiation in *Silene*  
568 *maritima* With.
- 569 **Baker AJM. 1978.** Ecophysiological Aspects of Zinc Tolerance in *Silene* *maritima* With.  
570 *New Phytologist* **80**: 635–642.
- 571 **Baldwin JM. 1896.** A New Factor in Evolution. *The American Naturalist* **30**: 441–451.
- 572 **Bidar G, Pruvot C, Garçon G, Verdin A, Shirali P, Douay F. 2009.** Seasonal and  
573 annual variations of metal uptake, bioaccumulation, and toxicity in *Trifolium repens* and  
574 *Lolium perenne* growing in a heavy metal-contaminated field. *Environmental Science*  
575 *and Pollution Research* **16**: 42–53.
- 576 **Bittner NKJ, Mack KL, Nachman MW. 2021.** Gene expression plasticity and desert  
577 adaptation in house mice\*. *Evolution* **75**: 1477–1491.
- 578 **Bolnick DI, Barrett RDH, Oke KB, Rennison DJ, Stuart YE. 2018.** (Non)Parallel  
579 Evolution. *Annual Review of Ecology, Evolution, and Systematics* **49**: 303–330.
- 580 **Bryant DM, Johnson K, DiTommaso T, Tickle T, Couger MB, Payzin-Dogru D, Lee**  
581 **TJ, Leigh ND, Kuo TH, Davis FG, et al. 2017.** A Tissue-Mapped Axolotl De Novo  
582 Transcriptome Enables Identification of Limb Regeneration Factors. *Cell Reports* **18**:  
583 762–776.
- 584 **Christin PA, Weinreich DM, Besnard G. 2010.** Causes and evolutionary significance  
585 of genetic convergence. *Trends in Genetics* **26**: 400–405.
- 586 **Conway Morris S. 2003.** *Life's Solution: Inevitable Humans in a Lonely Universe -*  
587 *Simon Conway Morris - Google Books.* Cambridge: Cambridge University Press.
- 588 **Das N, Bhattacharya S, Maiti MK. 2016.** Enhanced cadmium accumulation and  
589 tolerance in transgenic tobacco overexpressing rice metal tolerance protein gene OsMTP1  
590 is promising for phytoremediation. *Plant Physiology and Biochemistry* **105**: 297–309.
- 591 **Deram A, Denayer FO, Petit D, Van Haluwyn C. 2006.** Seasonal variations of  
592 cadmium and zinc in *Arrhenatherum elatius*, a perennial grass species from highly  
593 contaminated soils. *Environmental Pollution* **140**: 62–70.
- 594 **Draghi JA, Whitlock MC. 2012.** Phenotypic plasticity facilitates mutational variance,  
595 genetic variance, and evolvability along the major axis of environmental variation.  
596 *Evolution* **66**: 2891–2902.
- 597 **Eren E, Argüello JM. 2004.** Arabidopsis HMA2, a Divalent Heavy Metal-Transporting  
598 P<sub>IB</sub>-Type ATPase, Is Involved in Cytoplasmic Zn<sup>2+</sup> Homeostasis. *Plant Physiology* **136**:  
599 3712–3723.
- 600 **Feiner N, Rago A, While GM, Uller T. 2018.** Signatures of selection in embryonic  
601 transcriptomes of lizards adapting in parallel to cool climate. *Evolution* **72**: 67–81.

- 602 **Fischer EK, Song Y, Hughes KA, Zhou W, Hoke KL. 2021.** Nonparallel  
603 transcriptional divergence during parallel adaptation. *Molecular Ecology* **30**: 1516–1530.
- 604 **Ghalambor CK, Hoke KL, Ruell EW, Fischer EK, Reznick DN, Hughes KA. 2015.**  
605 Non-adaptive plasticity potentiates rapid adaptive evolution of gene expression in nature.  
606 *Nature* **525**: 372–375.
- 607 **Ghalambor CK, McKay JK, Carroll SP, Reznick DN. 2007.** Adaptive versus non-  
608 adaptive phenotypic plasticity and the potential for contemporary adaptation in new  
609 environments. *Functional Ecology* **21**: 394–407.
- 610 **Gleason LU, Burton RS. 2015.** RNA-seq reveals regional differences in transcriptome  
611 response to heat stress in the marine snail *Chlorostoma funebris*. *Molecular Ecology* **24**:  
612 610–627.
- 613 **Gould SJ. 1989.** *Wonderful life: The Burgess shale and the nature of history*. New York  
614 City: W. W. Norton & Co.
- 615 **Gould BA, Chen Y, Lowry DB. 2018.** Gene regulatory divergence between locally  
616 adapted ecotypes in their native habitats. *Molecular Ecology* **27**: 4174–4188.
- 617 **Grotz N, Fox T, Connolly E, Park W, Guerinot M Lou, Eide D. 1998.** Identification  
618 of a family of zinc transporter genes from *Arabidopsis* that respond to zinc deficiency.  
619 *Proceedings of the National Academy of Sciences of the United States of America* **95**:  
620 7220–7224.
- 621 **Gugger PF, Peñaloza-Ramírez JM, Wright JW, Sork VL. 2017.** Whole-transcriptome  
622 response to water stress in a California endemic oak, *Quercus lobata*. *Tree Physiology* **37**:  
623 632–644.
- 624 **Haas BJ, Papanicolaou A, Yassour M, Grabherr M, Blood PD, Bowden J, Couger**  
625 **MB, Eccles D, Li B, Lieber M, et al. 2013.** De novo transcript sequence reconstruction  
626 from RNA-seq using the Trinity platform for reference generation and analysis. *Nature*  
627 *Protocols* **8**: 1494–1512.
- 628 **Hanson D, Hu J, Hendry AP, Barrett RDH. 2017.** Heritable gene expression  
629 differences between lake and stream stickleback include both parallel and antiparallel  
630 components. *Heredity* **119**: 339–348.
- 631 **Hargreaves AD, Swain MT, Hegarty MJ, Logan DW, Mulley JF. 2014.** Restriction  
632 and Recruitment—Gene Duplication and the Origin and Evolution of Snake Venom  
633 Toxins. *Genome Biology and Evolution* **6**: 2088–2095.
- 634 **Heckel K von, Stephan W, Hutter S. 2016.** Canalization of gene expression is a major  
635 signature of regulatory cold adaptation in temperate *Drosophila melanogaster*. *BMC*  
636 *Genomics* **17**.
- 637 **Ho WC, Zhang J. 2018.** Evolutionary adaptations to new environments generally  
638 reverse plastic phenotypic changes. *Nature Communications* **9**: 1–11.
- 639 **Ho WC, Zhang J. 2019.** Genetic Gene Expression Changes during Environmental  
640 Adaptations Tend to Reverse Plastic Changes Even after the Correction for Statistical  
641 Nonindependence. *Molecular Biology and Evolution* **36**: 604–612.
- 642 **Huang Y, Agrawal AF. 2016.** Experimental Evolution of Gene Expression and Plasticity  
643 in Alternative Selective Regimes (DJ Begun, Ed.). *PLOS Genetics* **12**: e1006336.
- 644 **Hussain D, Haydon MJ, Wang Y, Wong E, Sherson SM, Young J, Camakaris J,**  
645 **Harper JF, Cobbett CS. 2004.** P-type ATPase heavy metal transporters with roles in  
646 essential zinc homeostasis in *Arabidopsis*. *Plant Cell* **16**: 1327–1339.



- 647 **Jacobs A, Carruthers M, Yurchenko A, Gordeeva N V., Alekseyev SS, Hooker O,**  
648 **Leong JS, Minkley DR, Rondeau EB, Koop BF, et al. 2020.** Parallelism in eco-  
649 morphology and gene expression despite variable evolutionary and genomic backgrounds  
650 in a Holarctic fish. *PLoS Genetics* **16**: e1008658.
- 651 **Josephs EB, Etten ML Van, Harkess A, Platts A, Baucom RS. 2021.** Adaptive and  
652 maladaptive expression plasticity underlying herbicide resistance in an agricultural weed.  
653 *Evolution Letters*.
- 654 **Josephs EB, Lee YW, Stinchcombe JR, Wright SI. 2015.** Association mapping reveals  
655 the role of purifying selection in the maintenance of genomic variation in gene  
656 expression. *Proceedings of the National Academy of Sciences of the United States of*  
657 *America* **112**: 15390–15395.
- 658 **Kelly M. 2019.** Adaptation to climate change through genetic accommodation and  
659 assimilation of plastic phenotypes. *Philosophical Transactions of the Royal Society B:*  
660 *Biological Sciences* **374**.
- 661 **Kenkel CD, Matz M V. 2017.** Gene expression plasticity as a mechanism of coral  
662 adaptation to a variable environment. *Nature Ecology & Evolution* **1**: 14.
- 663 **Kenney BC. 1982.** Beware of spurious self-correlations! *Water Resources Research* **18**:  
664 1041–1048.
- 665 **Kim D, Paggi JM, Park C, Bennett C, Salzberg SL. 2019.** Graph-based genome  
666 alignment and genotyping with HISAT2 and HISAT-genotype. *Nature Biotechnology* **37**:  
667 907–915.
- 668 **Kobae Y, Uemura T, Sato MH, Ohnishi M, Mimura T, Nakagawa T, Maeshima M.**  
669 **2004.** Zinc Transporter of Arabidopsis thaliana AtMTP1 is Localized to Vacuolar  
670 Membranes and Implicated in Zinc Homeostasis. *Plant and Cell Physiology* **45**: 1749–  
671 1758.
- 672 **Koch EL, Guillaume F. 2020.** Restoring ancestral phenotypes is a general pattern in  
673 gene expression evolution during adaptation to new environments in *Tribolium*  
674 *castaneum*. *Molecular Ecology* **29**: 3938–3953.
- 675 **Lee TH, Guo H, Wang X, Kim C, Paterson AH. 2014.** SNPhylo: A pipeline to  
676 construct a phylogenetic tree from huge SNP data. *BMC Genomics* **15**: 162.
- 677 **Levis NA, Isdaner AJ, Pfennig DW. 2018.** Morphological novelty emerges from pre-  
678 existing phenotypic plasticity. *Nature Ecology and Evolution* **2**: 1289–1297.
- 679 **Li L, Li A, Song K, Meng J, Guo X, Li S, Li C, De Wit P, Que H, Wu F, et al. 2018.**  
680 Divergence and plasticity shape adaptive potential of the Pacific oyster. *Nature Ecology*  
681 *and Evolution* **2**: 1751–1760.
- 682 **Liu D, Liu Y, Rao J, Wang G, Li H, Ge F, Chen C. 2013.** Overexpression of the  
683 glutathione S-transferase gene from *Pyrus pyrifolia* fruit improves tolerance to abiotic  
684 stress in transgenic tobacco plants. *Molecular Biology* **47**: 515–523.
- 685 **Losos JB. 2011.** Convergence, adaptation, and constraint. *Evolution* **65**: 1827–1840.
- 686 **Love MI, Huber W, Anders S. 2014.** Moderated estimation of fold change and  
687 dispersion for RNA-seq data with DESeq2. *Genome Biology* **15**: 550.
- 688 **Mäkinen H, Papakostas S, Vøllestad LA, Leder EH, Primmer CR. 2016.** Plastic and  
689 evolutionary gene expression responses are correlated in European grayling (*Thymallus*  
690 *thymallus*) subpopulations adapted to different thermal environments. *Journal of*  
691 *Heredity* **107**: 82–89.

- 692 **Mallard F, Nolte V, Schlötterer C. 2020.** The Evolution of Phenotypic Plasticity in  
693 Response to Temperature Stress. *Genome Biology and Evolution* **12**: 2429–2440.
- 694 **Martinoia E, Grill E, Tommasini R, Kreuz K, Amrhein N. 1993.** ATP-dependent  
695 glutathione S-conjugate ‘export’ pump in the vacuolar membrane of plants. *Nature* **364**:  
696 247–249.
- 697 **Mistry J, Finn RD, Eddy SR, Bateman A, Punta M. 2013.** Challenges in homology  
698 search: HMMER3 and convergent evolution of coiled-coil regions. *Nucleic Acids*  
699 *Research* **41**: e121–e121.
- 700 **Moczek AP, Sultan S, Foster S, Ledón-Rettig C, Dworkin I, Nijhout HF, Abouheif**  
701 **E, Pfennig DW. 2011.** The role of developmental plasticity in evolutionary innovation.  
702 *Proceedings of the Royal Society B: Biological Sciences* **278**: 2705–2713.
- 703 **Moreno-Villena JJ, Dunning LT, Osborne CP, Christin PA. 2018.** Highly Expressed  
704 Genes Are Preferentially Co-Opted for C 4 Photosynthesis. *Molecular Biology and*  
705 *Evolution* **35**: 94–106.
- 706 **Oke KB, Bukhari M, Kaeuffer R, Rolshausen G, Räsänen K, Bolnick DI, Peichel**  
707 **CL, Hendry AP. 2016.** Does plasticity enhance or dampen phenotypic parallelism? A  
708 test with three lake-stream stickleback pairs. *Journal of Evolutionary Biology* **29**: 126–  
709 143.
- 710 **Orgogozo V. 2015.** Replaying the tape of life in the twenty-first century. *Interface Focus*  
711 **5**.
- 712 **Papadopulos AST, Helmstetter AJ, Osborne OG, Comeault AA, Wood DP, Straw**  
713 **EA, Mason L, Fay MF, Parker J, Dunning LT, et al. 2021.** Rapid Parallel Adaptation  
714 to Anthropogenic Heavy Metal Pollution. *Molecular Biology and Evolution* **38**: 3724–  
715 3736.
- 716 **Parker DJ, Bast J, Jalvingh K, Dumas Z, Robinson-Rechavi M, Schwander T. 2019.**  
717 Repeated evolution of asexuality involves convergent gene expression changes.  
718 *Molecular Biology and Evolution* **36**: 350–364.
- 719 **Passow CN, Henspita C, Shaw JH, Quackenbush CR, Warren WC, Scharl M,**  
720 **Arias-Rodriguez L, Kelley JL, Tobler M. 2017.** The roles of plasticity and evolutionary  
721 change in shaping gene expression variation in natural populations of extremophile fish.  
722 *Molecular Ecology* **26**: 6384–6399.
- 723 **Rivera HE, Aichelman HE, Fifer JE, Kriefall NG, Wuitchik DM, Wuitchik SJS,**  
724 **Davies SW. 2021.** A framework for understanding gene expression plasticity and its  
725 influence on stress tolerance. *Molecular Ecology* **30**: 1381–1397.
- 726 **Schaum E, Rost B, Millar AJ, Collins S. 2013.** Variation in plastic responses of a  
727 globally distributed picoplankton species to ocean acidification. *Nature Climate Change*  
728 **3**: 298–302.
- 729 **Scoville AG, Pfrender ME. 2010.** Phenotypic plasticity facilitates recurrent rapid  
730 adaptation to introduced predators. *Proceedings of the National Academy of Sciences*  
731 **107**: 4260–4263.
- 732 **Seppely M, Manni M, Zdobnov EM. 2019.** BUSCO: Assessing genome assembly and  
733 annotation completeness. In: *Methods in Molecular Biology*. Humana Press Inc., 227–  
734 245.
- 735 **Singh S, Parihar P, Singh R, Singh VP, Prasad SM. 2016.** Heavy metal tolerance in  
736 plants: Role of transcriptomics, proteomics, metabolomics, and ionomics. *Frontiers in*

737 *Plant Science* **6**: 1143.  
738 **Soneson C, Love MI, Robinson MD. 2015.** Differential analyses for RNA-seq:  
739 transcript-level estimates improve gene-level inferences. *F1000Research* **4**: 1521.  
740 **Stephens M. 2017.** False discovery rates: A new deal. *Biostatistics* **18**: 275–294.  
741 **Stern DL. 2013.** The genetic causes of convergent evolution.  
742 **Stern DB, Crandall KA. 2018.** The Evolution of Gene Expression Underlying Vision  
743 Loss in Cave Animals. *Molecular Biology and Evolution* **35**: 2005–2014.  
744 **Swaggers J, Spanier KI, Stoks R. 2020.** Genetic compensation rather than genetic  
745 assimilation drives the evolution of plasticity in response to mild warming across  
746 latitudes in a damselfly. *Molecular Ecology* **29**: 4823–4834.  
747 **Velotta JP, Ivy CM, Wolf CJ, Scott GR, Cheviron ZA. 2018.** Maladaptive phenotypic  
748 plasticity in cardiac muscle growth is suppressed in high-altitude deer mice. *Evolution*  
749 **72**: 2712–2727.  
750 **Verret F, Gravot A, Auroy P, Leonhardt N, David P, Nussaume L, Vavasseur A,**  
751 **Richaud P. 2004.** Overexpression of AtHMA4 enhances root-to-shoot translocation of  
752 zinc and cadmium and plant metal tolerance. *FEBS Letters* **576**: 306–312.  
753 **Waldvogel A, Feldmeyer B, Rolshausen G, Exposito-Alonso M, Rellstab C, Kofler**  
754 **R, Mock T, Schmid K, Schmitt I, Bataillon T, et al. 2020.** Evolutionary genomics can  
755 improve prediction of species' responses to climate change. *Evolution Letters* **4**: 4–18.  
756 **Wang SP, Althoff DM. 2019.** Phenotypic plasticity facilitates initial colonization of a  
757 novel environment. *Evolution* **73**: 303–316.  
758 **Young MD, Wakefield MJ, Smyth GK, Oshlack A. 2010.** Gene ontology analysis for  
759 RNA-seq: accounting for selection bias. *Genome Biology* **11**: R14.  
760 **Van Zaal BJD, Neuteboom LW, Pinas JE, Chardonnens AN, Schat H, Verkleij**  
761 **JAC, Hooykaas PJJ. 1999.** Overexpression of a novel Arabidopsis gene related to  
762 putative zinc-transporter genes from animals can lead to enhanced zinc resistance and  
763 accumulation. *Plant Physiology* **119**: 1047–1055.  
764 **Zhang H, Yang J, Li W, Chen Y, Lu H, Zhao S, Li D, Wei M, Li C. 2019.** PuHSFA4a  
765 enhances tolerance to excess zinc by regulating reactive oxygen species production and  
766 root development in populus. *Plant Physiology* **180**: 2254–2271.  
767  
768
